# Supplementary material for: The pH responsiveness of fluorescein loaded in polysaccharide composite films
Source: Royal Society of Chemistry journal article supplement (doi:10.1039/d3sm01112g), 2023-01-01
Supplement: d3sm01112g1.pdf [file d3sm01112g1.pdf]

# The pH Responsiveness of Fluorescein Loaded in Polysaccharide Composite Films

*Konatsu Takagi,<sup>†</sup> Takuya Sagawa,<sup>†, §</sup> Mineo Hashizume<sup>\*, †, §</sup>*

<sup>†</sup> Graduate School of Engineering, Tokyo University of Science, 6-3-1 Nijuku, Katsushika-ku, Tokyo, 125-8585, Japan

<sup>§</sup> Department of Industrial Chemistry, Faculty of Engineering, Tokyo University of Science, 6-3-1 Nijuku, Katsushika-ku, Tokyo, 125-8585, Japan

**–Totals– 10 pages, 11 figures**

## Table of Contents

|                                                                                                                                      |     |
|--------------------------------------------------------------------------------------------------------------------------------------|-----|
| Additional description for experimental procedures .....                                                                             | S2  |
| Figure S1 UV-vis spectra and fluorescence spectra of FL in buffer solutions .....                                                    | S4  |
| Figure S2 Molar ratio of FL and ionization degree of CS and CHI .....                                                                | S5  |
| Figure S3 Photographs of fluorescence of FL in buffer solutions .....                                                                | S5  |
| Figure S4 Photographs of CS/CHI films prepared by hot press techniques .....                                                         | S6  |
| Figure S5 FT-IR spectra of FL powder, CS/CHI film, and CS/CHI-FL film .....                                                          | S6  |
| Figure S6 Stress–strain curves of CS/CHI film and CS/CHI-FL film .....                                                               | S7  |
| Figure S7 Photographs of solubility tests for confirmation of FL solubility<br>in PB with different pH .....                         | S7  |
| Figure S8 Fluorescence spectra of CS/CHI-FL films after FL release in<br>each pH of PB and isomerization of neutral FL .....         | S8  |
| Figure S9 UV-Vis spectra and color change of the CS/CHI-FL films under<br>natural light at low and high relative humidity (RH) ..... | S9  |
| Figure S10 FT-IR spectra of CS/CHI films and CS/CHI-FL films<br>after HCl and NH <sub>3</sub> exposure .....                         | S10 |
| Figure S11 Mechanical strength of CS/CHI films and CS/CHI-FL films<br>after HCl and NH <sub>3</sub> exposure .....                   | S10 |

### **Preparation of phosphate buffers (PB) and calculation of these ionic strength.**

The preparation of each PB (10 mM, pH 2.0, 3.0, 5.8, 7.4, and 8.0) was conducted by previously reported procedures with several modifications.<sup>1)</sup> Initially, 0.20 M of NaH<sub>2</sub>PO<sub>4</sub> aqueous solution (aq.) and Na<sub>2</sub>HPO<sub>4</sub> aq. were prepared, respectively. The pH 5.8 of PB was prepared as follows; 4.0 mL of the Na<sub>2</sub>HPO<sub>4</sub> aq. and 46.0 mL of the NaH<sub>2</sub>PO<sub>4</sub> aq. were mixed and diluted in 100 mL of measuring flask. The pH 7.4 and 8.0 of PB were obtained by the same procedure, and 40.5 mL of the Na<sub>2</sub>HPO<sub>4</sub> aq. and 9.50 mL of the NaH<sub>2</sub>PO<sub>4</sub> aq. were used to obtain pH 7.4 of PB. To produce pH 8.0 of PB, 47.3 mL of the Na<sub>2</sub>HPO<sub>4</sub> aq. and 2.7 mL of the NaH<sub>2</sub>PO<sub>4</sub> aq. were used. On the other hand, pH 2.0 and 3.0 of PB were prepared by mixing 0.20 M of NaH<sub>2</sub>PO<sub>4</sub> aq. (50 mL) and 6 M of HCl aq. (0.90 and 0.40 mL, respectively).

The ionic strength of each PB was calculated by equation (A).

$$I = \frac{1}{2} \sum_{i=1}^n C_i Z_i^2 \quad (\text{A})$$

Here,  $c_i$  is the molar concentration of the ion and  $z_i$  is the charge number of the ion. Each ionic strength of PB (pH 2.0, 3.0, 5.8, 7.4, 8.0) was 0.007, 0.010, 0.011, 0.022, and 0.027, respectively.

### **Calculation method for the loading amount of FL in CS/CHI films.**

The amount of FL loaded on the CS/CHI films was calculated with Eq. S1 from the molar amount of initial FL amount in the CS solution ( $n_0$ ), the amount of FL in the supernatant after PIC gel formation (supernatant 1) ( $n_1$ ), and the amount of FL contained in the washing solution (supernatant 2) ( $n_2$ ). The amount of each FL ( $n_1$  and  $n_2$ ) was obtained from measurement of the absorbance of FL-derived peak at 492 nm using a UV-vis spectrophotometer. The specific procedure is as follows. The volumes of the supernatant 1 and supernatant 2 were measured using graduated cylinders. Each supernatant was dispensed with a micropipette and was diluted by PB at pH 8.0 to 100 times (supernatant 1) and 10 times (supernatant 2). Then, measurement

of UV-Vis spectra of these solution was performed. From the results of the UV-vis measurement, the  $n_1$  and  $n_2$  are calculated using the following Eq. S2. The amount of loading FL was calculated from the difference from the number of moles of FL added initially ( $n_0$ ) (Eq. S1).

$$\text{The amount of loading FL (\%)} = n_0 - n_1 - n_2 \quad (\text{S1})$$

$$\text{The amount of FL (n, mol)} = A \times V \times d / (1000 \times \varepsilon) \quad (\text{S2})$$

where  $A$  is the absorbance of FL solution,  $\varepsilon$  is molar extinction coefficient  $V$  is amount of the solution (mL), and  $d$  is dilution factor (10 or 100).

#### Reference

- 1) Z. Tamura, T. Morioka, M. Maeda, and A. Tsuji, Spectrophotometric estimation of the  $pK_a$  values, absorption spectra and structural formulas of molecular species in aqueous solutions of fluorescein and sulfonefluorescein. *Bunseki Kagaku*, 1993, **43**, 339–346.

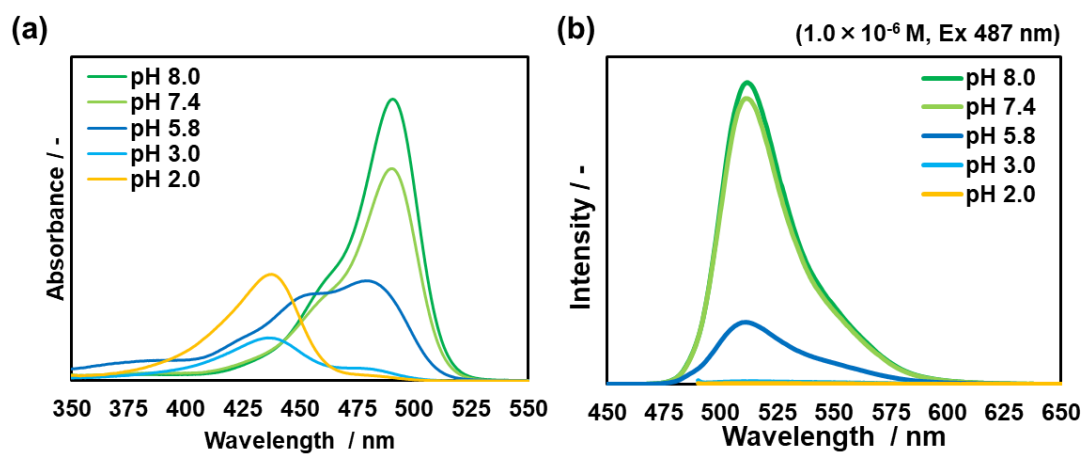

Figure S1. (a) UV-vis spectra and (b) fluorescence spectra of FL in different pH of buffer solutions.

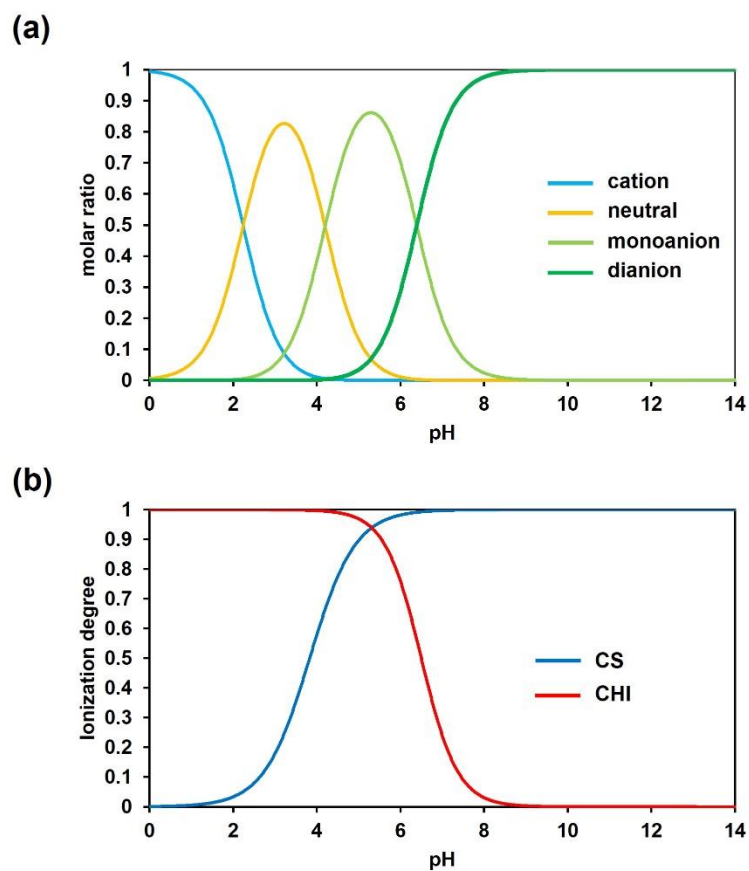

Figure S2. (a) Molar ratio of each ionic structure of FL; (b) ionization degree of CS and CHI.

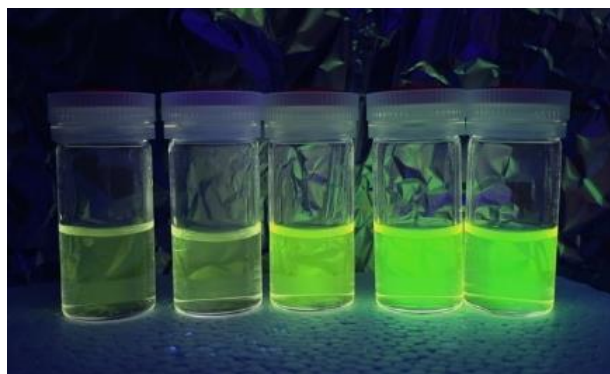

Figure S3. Photographs of fluorescence of FL in buffer solutions. (From left to right, pH 2.0, pH 3.0, pH 5.8, pH 7.4, pH 8.0)

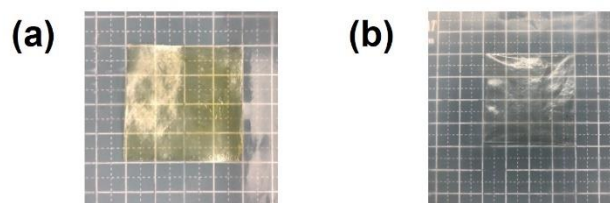

Figure S4. Photographs of CS/CHI films prepared by hot press techniques at (a) 120 °C and (b) 35 °C.

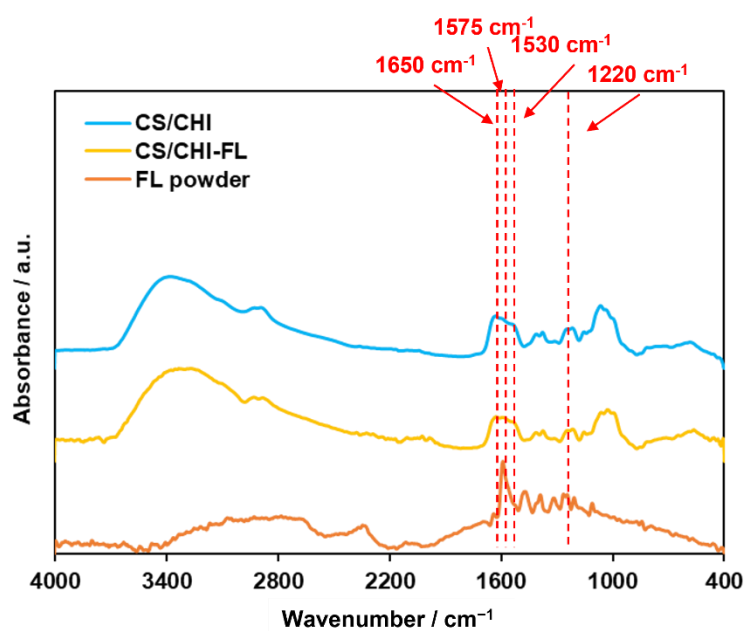

Figure S5. FT-IR spectra of FL powder, CS/CHI film, and CS/CHI-FL film.

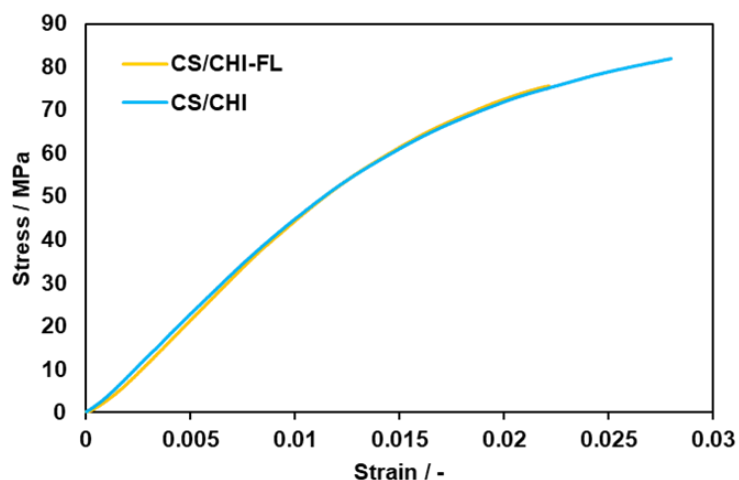

Figure S6. Stress-strain curves of CS/CHI film and CS/CHI-FL film.

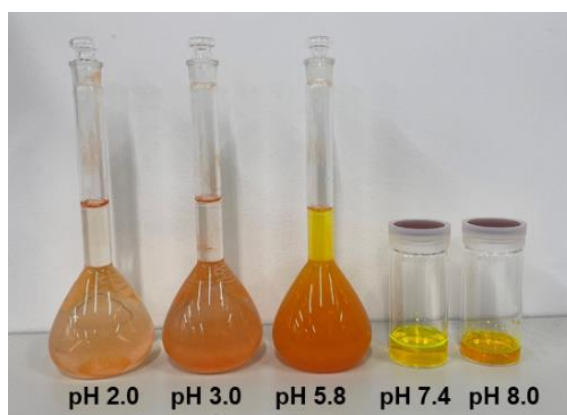

Figure S7. Photographs of solubility tests for confirmation of FL solubility in PB with different pH. More than 100 mL of PB was necessary for the dissolution of 5 mg of FL at pH 2.0, 3.0, and 5.8. At pH 7.4 and 8.0, 9 mL and 5 mL of PB were needed for the complete dissolution of 5 mg of FL.

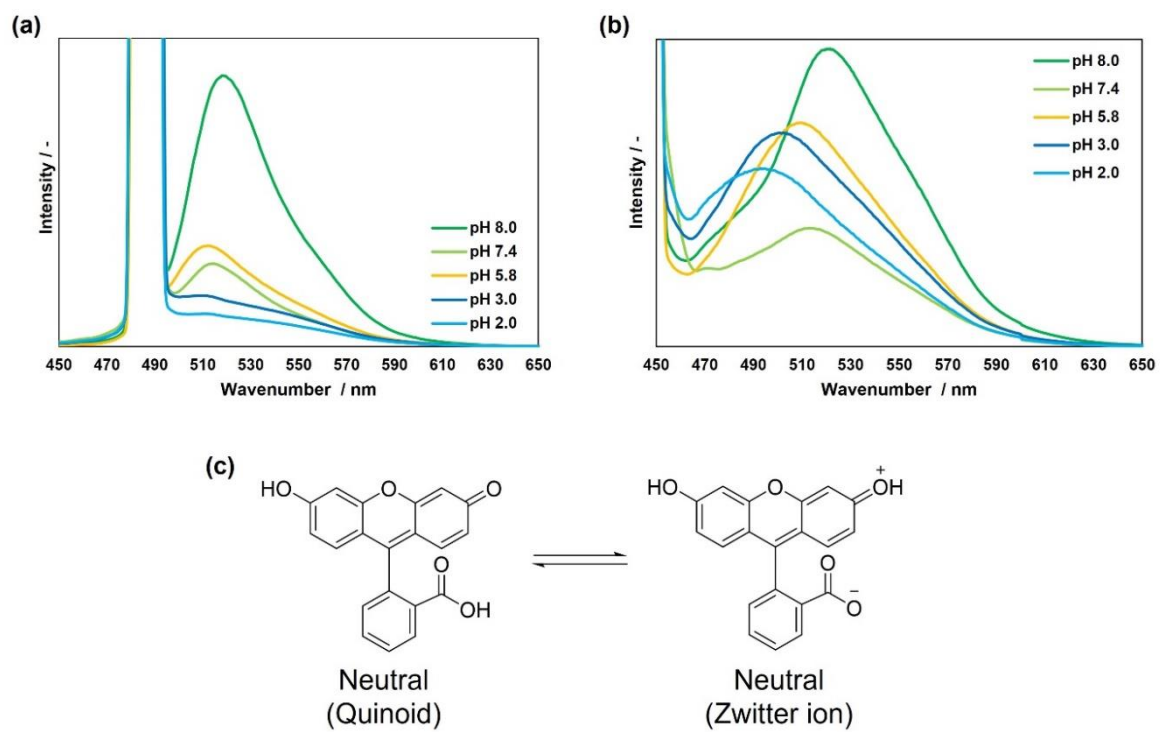

Figure S8. Fluorescence spectra of CS/CHI-FL films after FL release in each pH of PB with excitation wavelength of (a) 487 nm and (b) 445 nm; (c) isomerization of neutral FL.



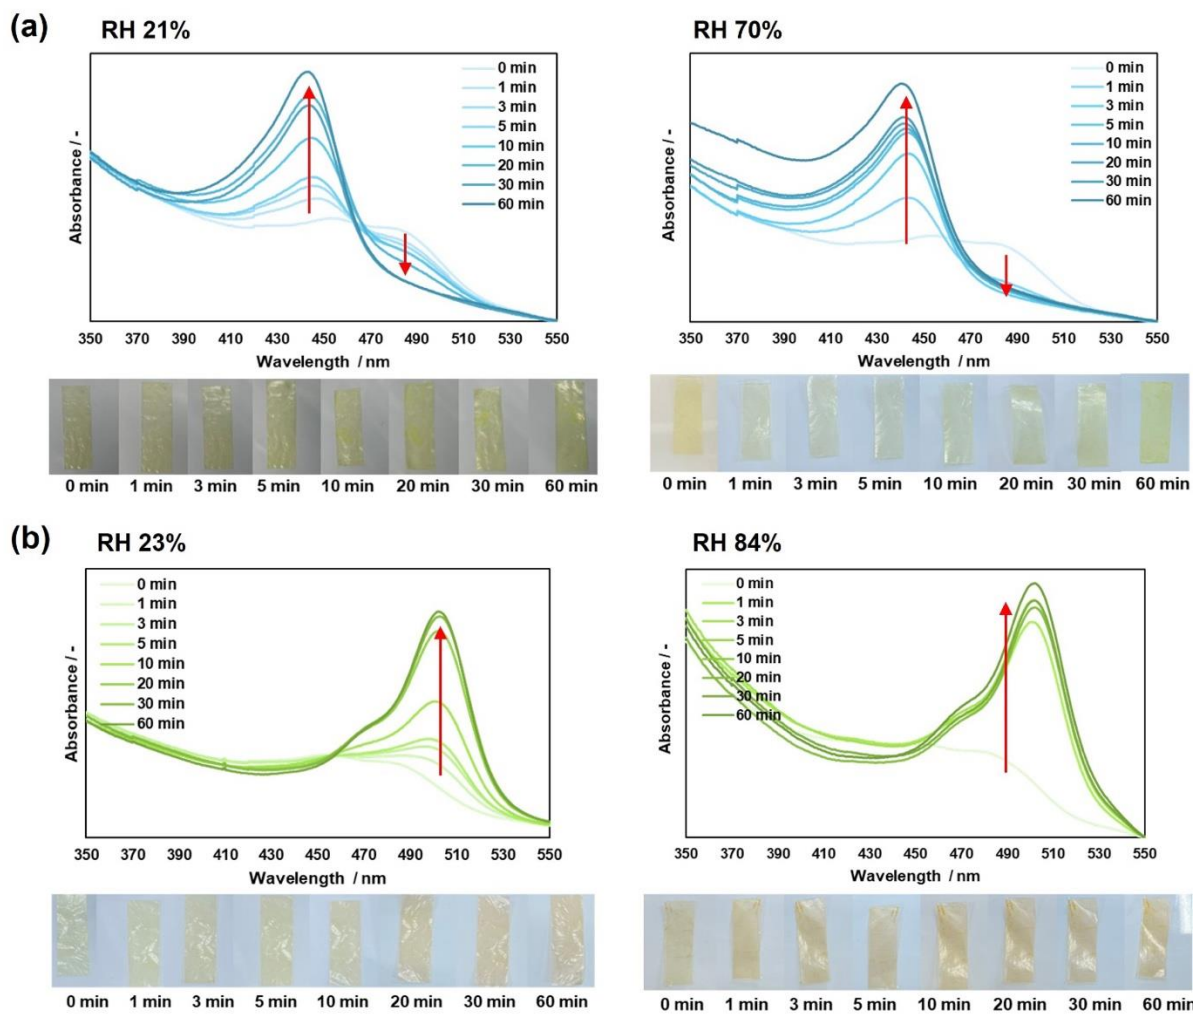

Figure S9. UV-Vis spectra and color change of the CS/CHI-FL films under natural light at low (left) and high (right) relative humidity (RH). (a) Exposed to HCl gas; (b) exposed to NH<sub>3</sub> gas.

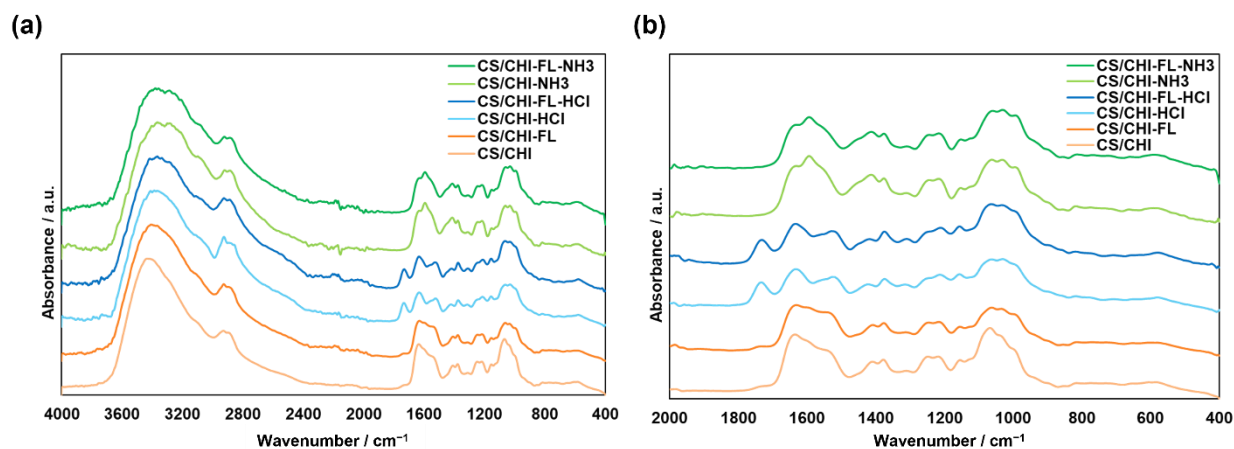

Figure S10. FT-IR spectra of CS/CHI films and CS/CHI-FL films after HCl and NH<sub>3</sub> exposure.

(a) 400–4000 cm<sup>-1</sup>; (b) 400–2000 cm<sup>-1</sup>.

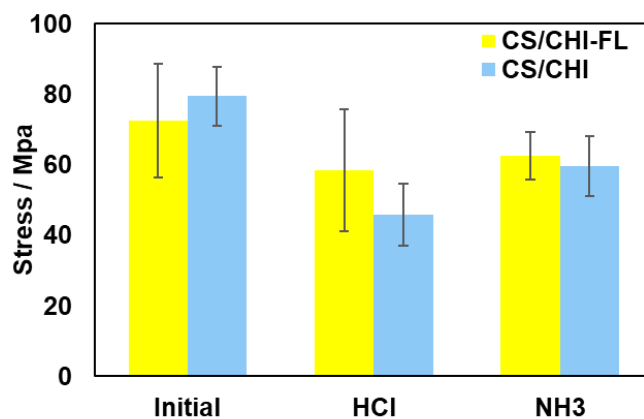

Figure S11. Mechanical strength of CS/CHI films and CS/CHI-FL films after HCl and NH<sub>3</sub> exposure.
